# Supplementary material for: Direct conversion of carbohydrates to diol by the combination of niobic acid and a hydrophobic ruthenium catalyst
Source: Royal Society of Chemistry journal article supplement (doi:10.1039/c7ra03939e), 2017-01-01
Supplement: c7ra03939e1.pdf [file c7ra03939e1.pdf]

Supporting Information for

**Direct conversion of carbohydrates to diol by the  
combination of niobic acid and hydrophobic ruthenium  
catalyst**

Ying Duan,<sup>a, b</sup> Jun Zhang,<sup>a</sup> Dongmi Li,<sup>a</sup> Dongsheng Deng,<sup>a</sup> Lu-Fang Ma,<sup>a</sup> and Yanliang Yang<sup>\*a</sup>

<sup>a</sup> Henan Key Laboratory of Function-Oriented Porous Material, College of Chemistry and  
Chemical Engineering, Luoyang Normal University, Luoyang 471934, P. R. China

<sup>b</sup> College of Food and Drug, Luoyang Normal University, Luoyang 471934, P. R. China

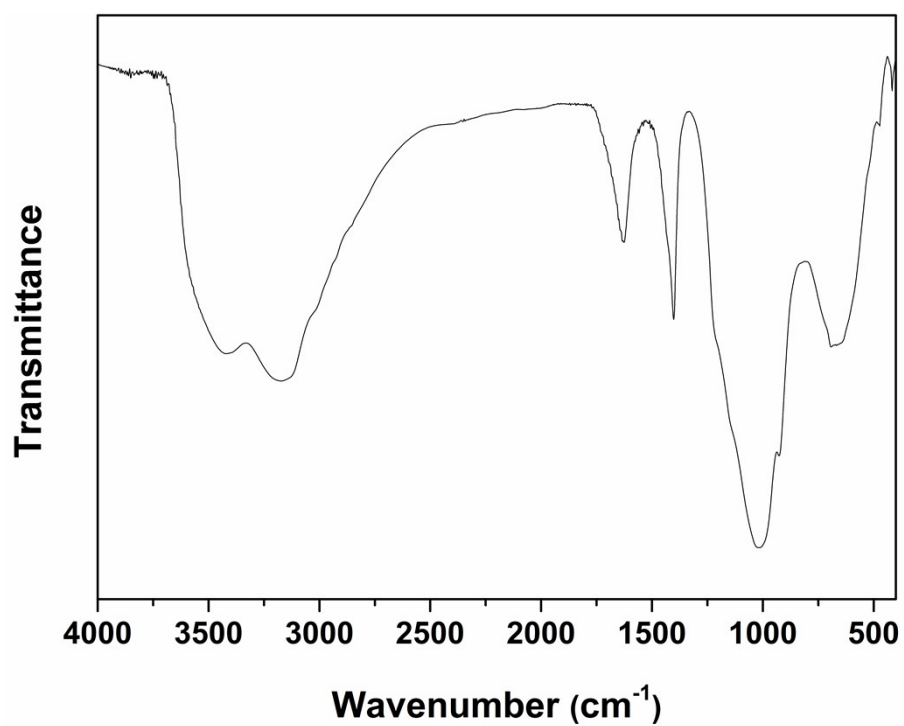

Figure S1 FT-IR spectrum of Nb<sub>2</sub>O<sub>5</sub>-FP.

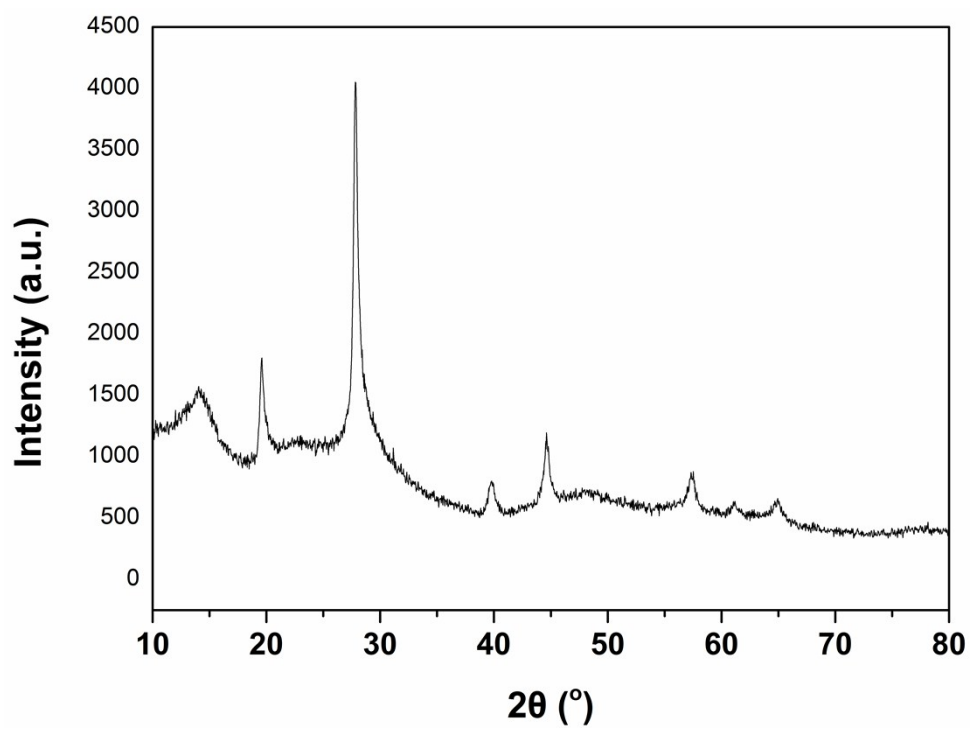

Figure S2 XRD pattern of Nb<sub>2</sub>O<sub>5</sub>-FP.

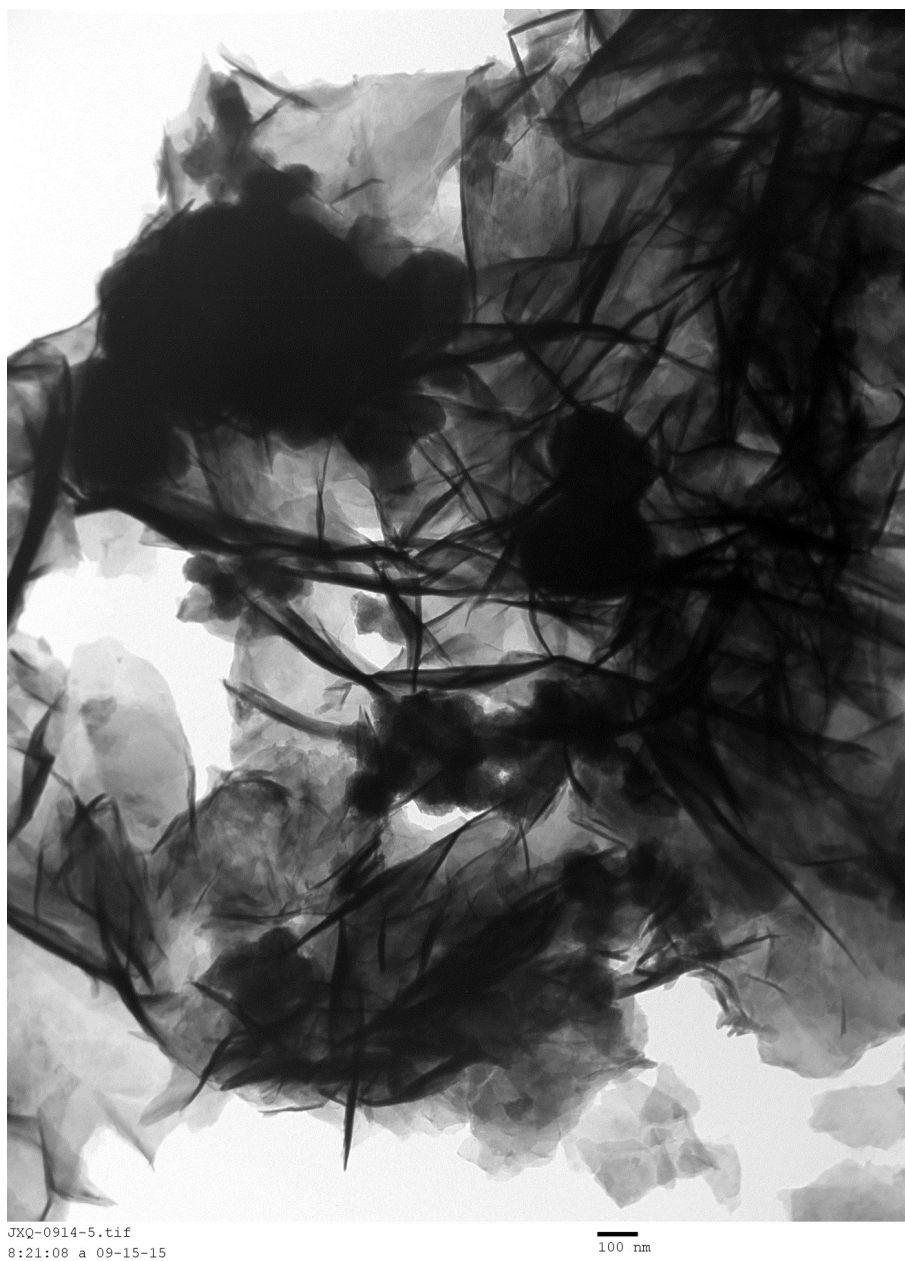

JXQ-0914-5.tif  
8:21:08 a 09-15-15

100 nm

Figure S3 TEM image of Nb<sub>2</sub>O<sub>5</sub>-FP.
